# Supplementary material
Source: PubMed Central journal article supplement (PMC7501193)
Supplement: NIHMS1613875-supplement-1.pdf [file NIHMS1613875-supplement-1.pdf]

## SUPPLEMENTAL DATA

**Table S1. The CHD4 shRNA sequences used in this study**

|          |                             |
|----------|-----------------------------|
| shCHD4#1 | 5'-GCGGGAGTTCAGTACCAATAA-3' |
| shCHD4#2 | 5'-CGAAGGTTTAAGCTCTTAGAA-3' |

**Table S2. The qPCR primers used in this study**

|              |                                         |
|--------------|-----------------------------------------|
| VEGFA mRNA   | Forward: 5'-CTTGCCTTGCTGCTCTAC-3'       |
|              | Reverse: 5'-TGGCTTGAAGATGTACTCG-3'      |
| LOX mRNA     | Forward: 5'-CGGCGGAGGAAAACCTGTCT-3'     |
|              | Reverse: 5'-TCGGCTGGGTAAAGAAATCTGA-3'   |
| 18S rRNA     | Forward: 5'-CGGCGACGACCCATTCGAAC-3'     |
|              | Reverse: 5'-GAATCGAACCCTGATTCCTCCGTC-3' |
| ANGPTL4 mRNA | Forward: 5'-GTCCACCGACCTCCCGTTA-3'      |
|              | Reverse: 5'-CCTCATGGTCTAGGTGCTTGT-3'    |
| NDNF mRNA    | Forward: 5'-ATCAGCCATACCCTGAGTTACC-3'   |
|              | Reverse: 5'-TGAATGGGTTGTTTCAGCAAAGA-3'  |
| RPL13A mRNA  | Forward: 5'-CTCAAGGTCGTGCGTCTG-3'       |
|              | Reverse: 5'-TGGCTTCTCTTTCCTCTTCTC-3'    |
| ANGPTL4 HRE  | Forward: 5'-ATTTGCTGTCCTGGCATC-3'       |
|              | Reverse: 5'-CCAGCTCATTCTCTGGAATC-3'     |
| VEGFA HRE    | Forward: 5'-CAGACTCCACAGTGCATAC-3'      |
|              | Reverse: 5'-AGTTTGTGGAGCTGAGAAC-3'      |
| LOX HRE      | Forward: 5'-GAAGATTTCTCCTTCCCTCAC-3'    |
|              | Reverse: 5'-GAAGCGCATCACTCCTTT-3'       |
| RPL13A gDNA  | Forward: 5'-GAGGCGAGGGTGATAGAG-3'       |
|              | Reverse: 5'-ACACACAAGGGTCCAATTC-3'      |

**Table S3. Gene ontology analysis of CHD4-induced HIF target genes by the DAVID**

| <b>Biological Process</b>                                       | <b>P-Value</b> |
|-----------------------------------------------------------------|----------------|
| angiogenesis                                                    | 3.20E-07       |
| response to hypoxia                                             | 2.00E-05       |
| extracellular matrix organization                               | 1.30E-03       |
| collagen catabolic process                                      | 1.60E-03       |
| cellular response to hypoxia                                    | 1.80E-03       |
| positive regulation of apoptotic process                        | 2.40E-03       |
| positive regulation of nitric oxide biosynthetic process        | 2.50E-03       |
| extracellular matrix disassembly                                | 3.50E-03       |
| positive regulation of neuron projection development            | 6.80E-03       |
| negative regulation of cell proliferation                       | 7.00E-03       |
| semaphorin-plexin signaling pathway                             | 9.50E-03       |
| protein homooligomerization                                     | 9.70E-03       |
| skeletal system development                                     | 1.00E-02       |
| positive regulation of JNK cascade                              | 1.10E-02       |
| signal transduction                                             | 1.20E-02       |
| cellular response to heat                                       | 1.30E-02       |
| sphingolipid metabolic process                                  | 1.70E-02       |
| positive regulation of angiogenesis                             | 1.90E-02       |
| cell-cell signaling                                             | 2.10E-02       |
| response to drug                                                | 2.10E-02       |
| positive regulation of actin filament polymerization            | 2.20E-02       |
| wound healing                                                   | 2.20E-02       |
| positive regulation of MAPK cascade                             | 2.30E-02       |
| response to osmotic stress                                      | 2.40E-02       |
| positive regulation of gene expression                          | 2.50E-02       |
| positive regulation of cell division                            | 2.50E-02       |
| positive regulation of protein kinase activity                  | 2.50E-02       |
| cell proliferation                                              | 2.50E-02       |
| positive regulation of osteoclast differentiation               | 2.60E-02       |
| negative regulation of phosphorylation                          | 2.90E-02       |
| positive regulation of NF-kappaB import into nucleus            | 3.10E-02       |
| negative regulation of neuron apoptotic process                 | 3.20E-02       |
| positive regulation of NF-kappaB transcription factor activity  | 3.30E-02       |
| positive regulation of cell migration                           | 3.70E-02       |
| positive regulation of neutrophil extravasation                 | 3.90E-02       |
| fever generation                                                | 3.90E-02       |
| cell adhesion                                                   | 4.50E-02       |
| negative regulation of axon extension involved in axon guidance | 4.70E-02       |
| positive regulation of mitotic nuclear division                 | 4.70E-02       |

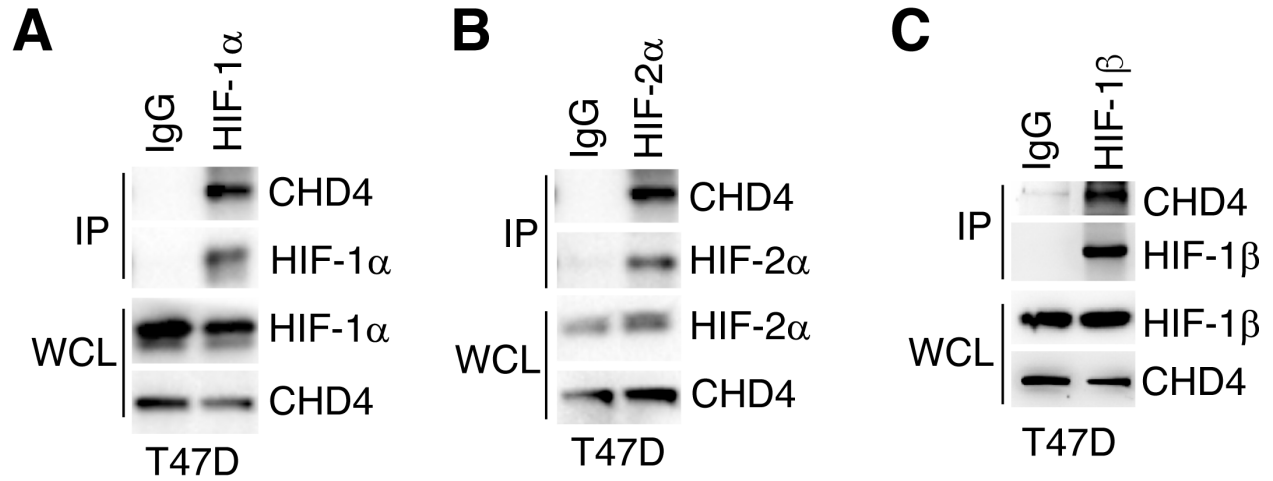

**Supplemental Figure S1.** CHD4 interacts with HIF-1 and HIF-2 in breast cancer T47D cells. (A-C) Co-IP with IgG, anti-HIF-1 $\alpha$  (A), anti-HIF-2 $\alpha$  (B), or anti-HIF-1 $\beta$  (C) antibody in T47D cells exposed to 1% O<sub>2</sub> for 6 hrs. WCL, whole cell lysate.

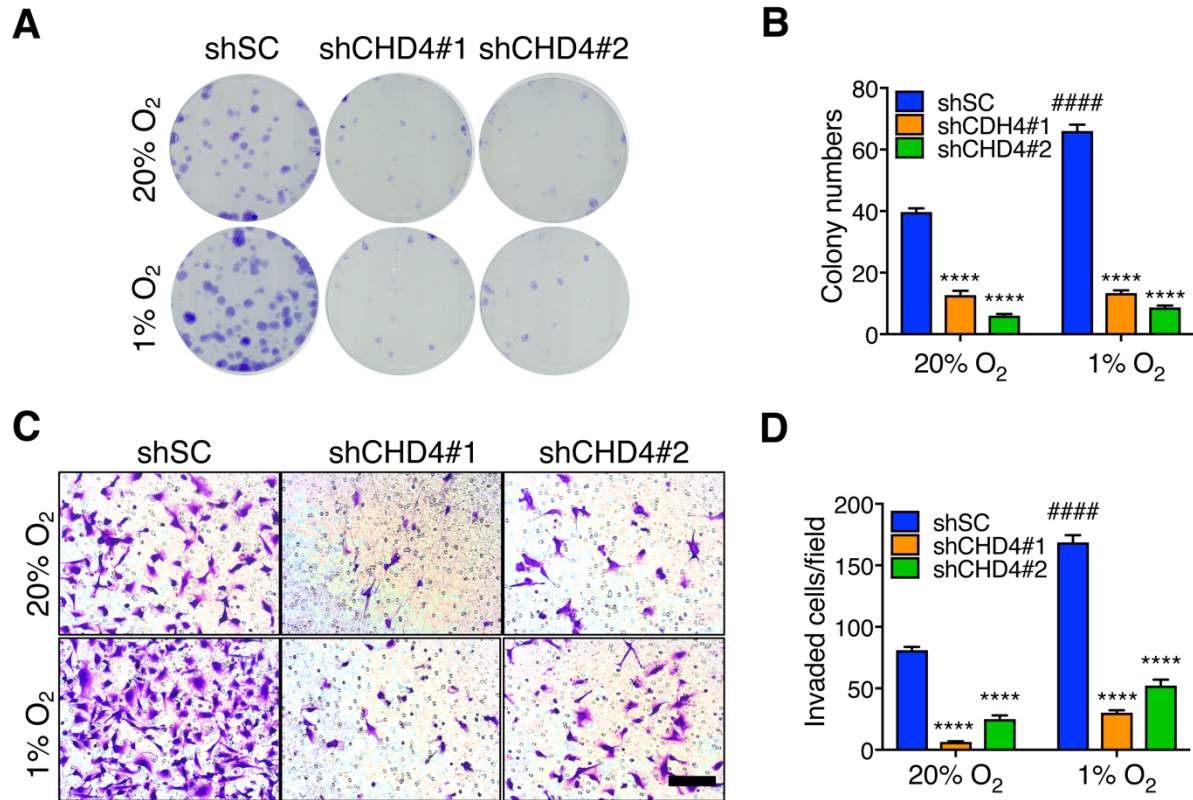

**Supplemental Figure S2.** CHD4 promotes colony formation and invasion of breast cancer cells. (A and B) Clonogenic assay in shSC and CHD4 KD MDA-MB-231 cells exposed to 20% or 1% O<sub>2</sub> for 14 days. Representative images from three independent experiments are shown in A. The data are quantified in B ( $n = 3$ , mean  $\pm$  SEM). \*\*\*\*  $p < 0.0001$  vs. shSC, #####  $p < 0.0001$  vs. 20% O<sub>2</sub>, by 2-way ANOVA with Turkey's test. (C and D) Invasion assay in shSC, CHD4 KD and rescued MDA-MB-231 cells exposed to 20% or 1% O<sub>2</sub> for 24 hrs. Representative images from four independent experiments are shown in C. The data are quantified in D ( $n = 4$ , mean  $\pm$  SEM). \*\*\*\*  $p < 0.0001$  vs. shSC, #####  $p < 0.0001$  vs. 20% O<sub>2</sub>, by 2-way ANOVA with Turkey's test. Scale bar, 100  $\mu$ m.

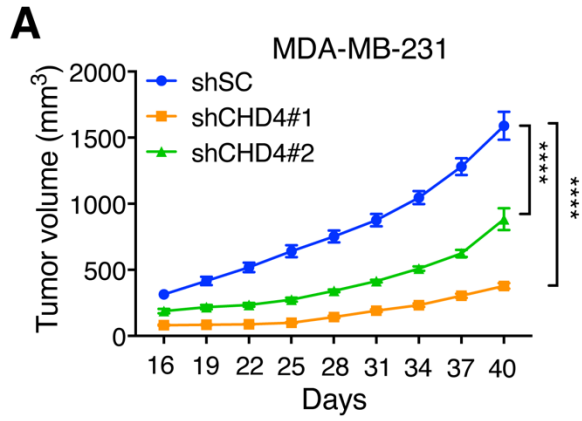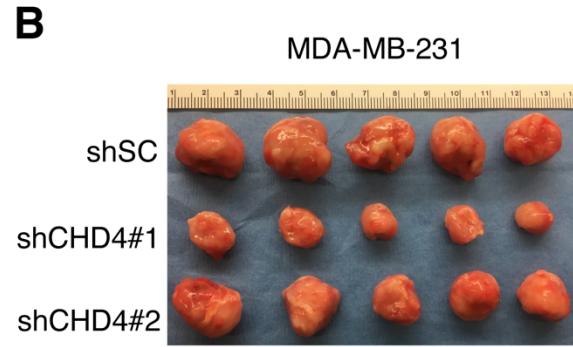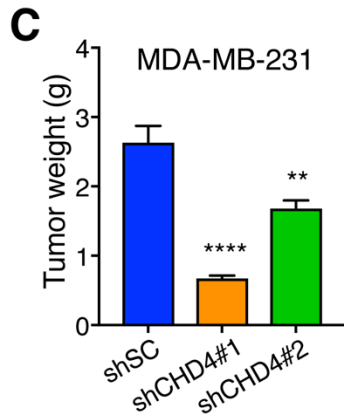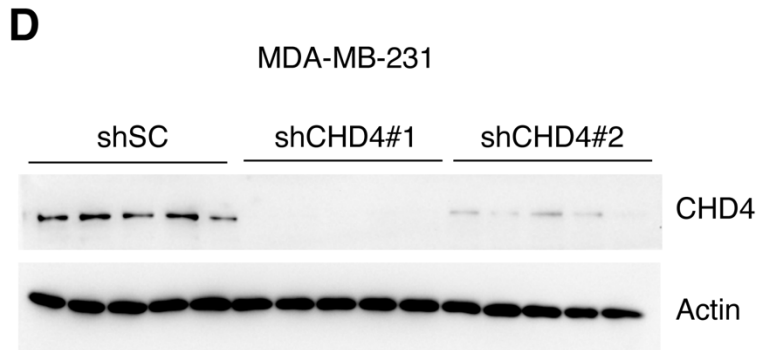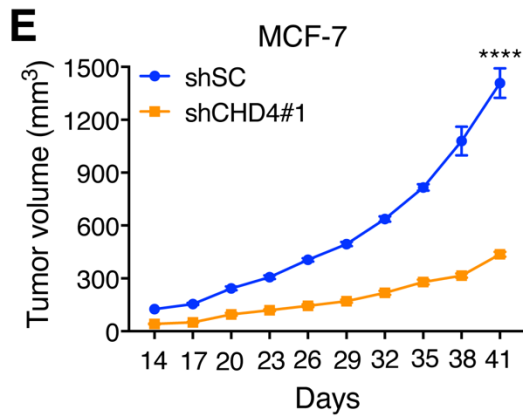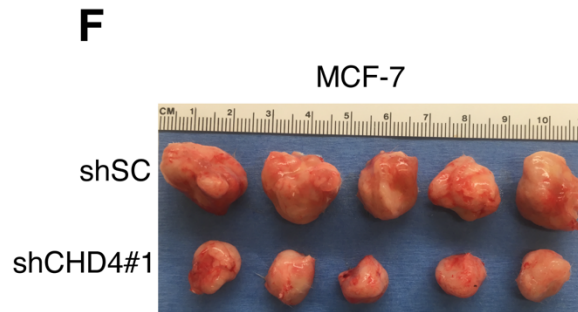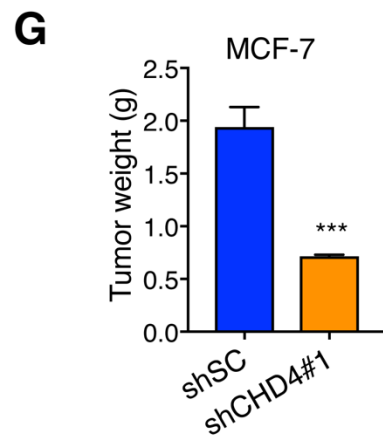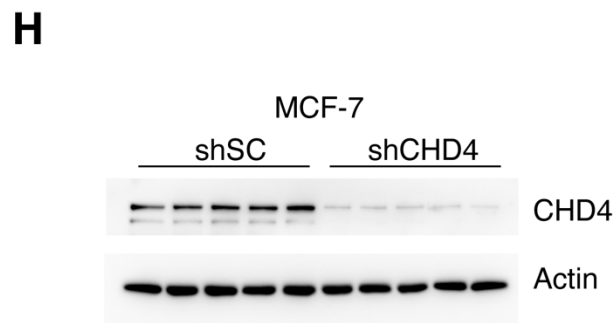

**Supplemental Figure S3.** CHD4 promotes breast tumor growth in mice. **(A-D)** shSC and CHD4 KD MDA-MB-231 cells were orthotopically implanted into the mammary fat pad of female NSG mice, respectively. Tumor growth curve **(A)**, image **(B)**, and weight **(C)** are shown ( $n = 5$ , mean  $\pm$  SEM). CHD4 KD in tumors was verified by immunoblot assay **(D)**. \*\* $p < 0.01$  by 1-way ANOVA with Dunnett's test. \*\*\*\* $p < 0.0001$ , by 1-way ANOVA with Dunnett's test or 2-way ANOVA with Turkey's test. **(E-H)** shSC and CHD4 KD MCF-7 cells were orthotopically implanted into the mammary fat pad of female NSG mice, respectively. Tumor growth curve **(E)**, image **(F)**, and weight **(G)** are shown ( $n = 5$ , mean  $\pm$  SEM). CHD4 KD in tumors was verified by immunoblot assay **(H)**. \*\*\* $p < 0.001$  by Student's  $t$  test. \*\*\*\* $p < 0.0001$ , by 2-way ANOVA with Sidak's test.
